# Supplementary material
Source: MDPI journal article supplement (https://www.mdpi.com/2073-4441/14/10/1532)
Supplement: s1 [file s1]

Archive with 3 entries (3 files):
- Supplementary Excel File S1.xlsx
- Supplementary Excel File S2.xlsx
- Supplementary Information.pdf
