# Supplementary material
Source: MDPI journal article supplement (https://www.mdpi.com/2073-4441/14/10/1532)
Supplement: s1 [file s1 › Supplementary Excel File S1.xlsx]

## Sheet: Sheet1
Year	Season	Specie	Cu/Ca	Zn/Ca	Pb/Ca	Sr/Ca	Mg/Ca
			[μmol/mol]
2021	Winter	Lachlanella sp	217.349	791.398	219.916	2303.02	118501
		Lachlanella sp	94.1061	863.849	107.424	2195.95	113583
		Lachlanella sp	92.7149	838.225	114.92	2205.11	114225
		Lachlanella sp	101.79	986.525	132.755	2169.31	107705
		P. calcariformata	4.42922	38.3222	9.2624	2682.17	140351
		P. calcariformata	3.57026	37.8119	24.5685	2696.55	135897
	Summer	Lachlanella sp	42.2364	763.893	52.628	2421.75	147875
		Lachlanella sp	72.4539	1058.46	89.0144	2388.19	138105
		Lachlanella sp	98.4763	769.604	147.142	2382.23	146352
		Lachlanella sp	118.399	1031.23	179.94	2463.55	144879
		Lachlanella sp	346.908	2781.55	195.071	2508.9	144082
		Lachlanella sp	339.933	1818.51	201.691	2299.83	123143
		P. calcariformata	7.35734	79.3097	15.8969	2735.89	141633
		P. calcariformata	4.56158	83.6755	14.2571	2602.03	142880
		P. calcariformata	4.19601	88.6112	14.6275	2549.79	145036
2013	Winter	Lachlanella sp	-	-	11.8207	2020.14	111070
		P. calcariformata	-	-	2.36751	2497.64	126741
		P. calcariformata	-	-	2.55622	2435.27	124373
	Summer	Lachlanella sp	-	-	25.0148	2533.53	124538
		Lachlanella sp	-	-	25.8517	2353.89	133372
		Lachlanella sp	-	-	40.5868	2024.3	117021
		Lachlanella sp	-	-	14.3752	2547.35	123214
		Lachlanella sp	-	-	13.6363	2217.71	126938
		P. calcariformata	-	-	1.16471	2580.94	150351
		P. calcariformata	-	-	1.45923	2471.86	146002
		P. calcariformata	-	-	1.78736	2498.72	144942
		P. calcariformata	-	-	0.974126	2489.89	147201
