# Supplementary material
Source: MDPI journal article supplement (https://www.mdpi.com/2073-4441/14/10/1532)
Supplement: s1 [file s1 › Supplementary Excel File S2.xlsx]

## Sheet: Sheet1
	Lachlanella
	Temperture	Cu/Ca [mmol/mol]	Zn/Ca [mmol/mol]	Pb/Ca [mmol/mol]
L25-s7-4	25	0.0281	1.528	0.0491
L25-s9-2	25	0.0101	1.259	0.0395
L25-s9-3	25	0.0089	1.086	0.033
L25-s9-4	25	0.01009	1.529	0.0599
L25-s9-5	25	0.0132	1.726	0.0577
L25-s10-4	25	0.0108	1.82	0.0524
L25-s12-1	25	0.0155	0.859	0.0303
L25-s12-4	25	0.0206	1.665	0.049
Average		0.0146613	1.434	0.0459857
SD		0.00663874	0.335482	0.0109958
RSD		0.452809	0.233948	0.239114
	P.calcariforamata
	Temperture	Cu/Ca [mmol/mol]	Zn/Ca [mmol/mol]	Pb/Ca [mmol/mol]
P25_2	25	0.026	0.1661	0.00349
P25_3	25	0.0289	0.2043	0.00471
P25_4	25	0.0103	0.0602	0.00192
P25_5	25	0.0455	0.1559	0.00403
P25_7	25	0.00367	0.201	0.00731
P25_9	25	0.0436	0.0919	0.00349
P25_10	25	0.0081	0.086	0.00246
P25_11	25	0.0033	0.0597	0.00187
P25_12	25	0.00724	0.18	0.00444
P25_13	25	0.0032	0.3	0.00779
P25_14	25	0.0303	0.319	0.00797
P25_17	25	0.022	0.145	0.0092
P25_18	25	0.0099	0.0614	0.0022
P25_19	25	0.00365	0.0638	0.00214
P25_20	25	0.0206	0.0718	0.00217
P25_22	25	0.0202	0.0815	0.00559
P25_23	25	0.0034	0.114	0.0071
P25_24	25	0.00064	0.0393	0.00201
P25_25	25	0.00215	0.0543	0.00257
P25_26	25	0.00085	0.0398	0.00188
P25_27	25	0.00536	0.0524	0.0024
P25_30	25	0.00193	0.0783	0.0021
Average		0.0136723	0.11935	0.00403818
SD		0.0138431	0.0806106	0.00238446
RSD		1.01249	0.675414	0.590479
