# Supplementary material
Source: MDPI journal article supplement (https://www.mdpi.com/2073-4441/14/10/1532)
Supplement: s1 [file s1 › Supplementary Information.pdf]

## Supplementary Information

# Establishing baseline assessment levels for monitoring coastal heavy metals using foraminiferal shells: A case study from the South-eastern Mediterranean

Lin Hooper<sup>1</sup>, Danna Titelboim<sup>2</sup>, Sigal Abramovich<sup>1</sup>, Barak Herut<sup>3</sup>, Nadya Teutsch<sup>4</sup>, Tal Benalabet<sup>5,6</sup> and Adi Torfstein<sup>5,6,\*</sup>

- <sup>1</sup> Department of Earth and Environmental Sciences, Ben-Gurion University of the Negev, Beer Sheva 8410501, Israel; hooperl@post.bgu.ac.il (L.H.); sigalabr@bgu.ac.il (S.A.)  
<sup>2</sup> Department of Earth Sciences, University of Oxford, Oxford OX1 3AN, UK; dannati@post.bgu.ac.il  
<sup>3</sup> National Institute of Oceanography, Israel Oceanographic and Limnological Research, Haifa 3108000, Israel; barak@ocean.org.il  
<sup>4</sup> Division of Geochemistry and Environmental Geology, Geological Survey of Israel, Jerusalem 9692100, Israel; nadya.teutsch@gsi.gov.il  
<sup>5</sup> The Fredy and Nadine Herrmann Institute of Earth Sciences, The Hebrew University of Jerusalem, Jerusalem 9190401, Israel; tal.benalabet@mail.huji.ac.il  
<sup>6</sup> Interuniversity Institute for Marine Sciences in Eilat, Eilat 8810302, Israel  
\* Correspondence: adi.torf@mail.huji.ac.il

### S1: Cleaning protocol description (modified after [37])

Specimens were placed in precleaned 2mL vials, were performed 1. Rinsing in Milli-Q water and sonication for 30 seconds (twice). The water was replaced with methanol and the vial was sonicated for another 30 seconds (twice). 2. An oxidative step to remove remaining organic matter. A 250  $\mu$ L aliquot composed of equal volumes of 30% H<sub>2</sub>O<sub>2</sub> and Suprapur 0.1M NaOH solution was added to each vial. Next, samples were placed on a prewarmed hot plate (65°C) for 5 minutes and were sonicated for another 5 minutes (twice). The entire procedure of step 2 was repeated twice. 3. Finally, the samples were rinsed in Milli-Q water (three times). The cleaning was performed at the ultraclean lab in the Interuniversity Institute for Marine Sciences (IUI, Eilat).

### S2: Quality control – blanks and standards

Table S2.1: Average and standard deviation values of in-house standards from three analytical sessions:

| Sampling date | Standard                  | Cu/Ca<br>[ $\mu$ mol/mol] | Zn/Ca<br>[ $\mu$ mol/mol] | Pb/Ca<br>[ $\mu$ mol/mol] | Sr/Ca<br>[ $\mu$ mol/mol] | Mg/Ca<br>[mmol/mol] |
|---------------|---------------------------|---------------------------|---------------------------|---------------------------|---------------------------|---------------------|
| March 2021    | <i>Amphistegina</i> tests | 1.51 $\pm$ 0.07           | 20.9 $\pm$ 0.7            | 74.3 $\pm$ 1.5            | 1716 $\pm$ 34             | 10.5 $\pm$ 0.2      |
|               | local Red Sea sediments   | 5.2 $\pm$ 0.1             | 14.4 $\pm$ 0.4            | 4.02 $\pm$ 0.09           | 103 $\pm$ 2               | 2.7 $\pm$ 0.1       |
| August 2021   | <i>Amphistegina</i> tests | 1.48 $\pm$ 0.05           | 20.1 $\pm$ 0.5            | 75.9 $\pm$ 0.8            | 1879 $\pm$ 36             | 5.3 $\pm$ 0.1       |
|               | local Red Sea sediments   | 5.1 $\pm$ 0.5             | 13.4 $\pm$ 0.4            | 4.86 $\pm$ 0.15           | 111 $\pm$ 3               | 1.3 $\pm$ 0.1       |
| 2013          | <i>Amphistegina</i> tests | 1.61 $\pm$ 0.02           | 22.8 $\pm$ 1.3            | 73.4 $\pm$ 0.4            | 1971 $\pm$ 19             | 12.6 $\pm$ 0.2      |
|               | local Red Sea sediments   | 4.8 $\pm$ 0.1             | 13.5 $\pm$ 0.5            | 4.80 $\pm$ 0.04           | 111 $\pm$ 2               | 3.0 $\pm$ 0.1       |

Table S2.2: Foraminiferal dissolution blanks (defined as 3 SD of the procedural blank) and detection limits.

| Sampling date |                 | Cu [ $\mu\text{g/L}$ ] | Zn [ $\mu\text{g/L}$ ] | Pb [ $\mu\text{g/L}$ ] | Sr [ $\mu\text{g/L}$ ] | Ca [ $\mu\text{g/L}$ ] | Mg [ $\mu\text{g/L}$ ] |
|---------------|-----------------|------------------------|------------------------|------------------------|------------------------|------------------------|------------------------|
| March 2021    |                 | 0.10 $\pm$ 0.07        | 0.95 $\pm$ 0.81        | 0.018 $\pm$ 0.009      | 0.025 $\pm$ 0.012      | 24 $\pm$ 16            | 2.2 $\pm$ 0.4          |
|               | Detection limit | 0.2                    | 2.5                    | 0.03                   | 0.04                   | 50                     | 1.5                    |
| August 2021   |                 | 0.04 $\pm$ 0.04        | 0.16 $\pm$ 0.10        | 0.017 $\pm$ 0.018      | 0.028 $\pm$ 0.068      | 20 $\pm$ 23            | 0.4 $\pm$ 0.7          |
|               | Detection limit | 0.1                    | 0.3                    | 0.06                   | 0.2                    | 70                     | 2.3                    |
| 2013          |                 | 0.05 $\pm$ 0.01        | 0.91 $\pm$ 0.77        | 0.006 $\pm$ 0.002      | 0.012 $\pm$ 0.005      | 16 $\pm$ 10            | 1.3 $\pm$ 0.4          |
|               | Detection limit | 0.03                   | 2.3                    | 0.01                   | 0.01                   | 30                     | 1.3                    |

Table S2.3: Seawater analyses: recovery, procedural blanks and detection limits (defined as 3 SD of the procedural blank) for the studied metals. Results of measured values CASS-6 and NASS-7 Certified Reference Materials are presented against certified values.

|                        | Recovery (%) | Procedural blank | Detection limit | CASS-6 Certified value | CASS-6 Measured value (n=2) | NASS-7 Certified value | NASS-7 Measured value (n=5) |
|------------------------|--------------|------------------|-----------------|------------------------|-----------------------------|------------------------|-----------------------------|
| Zn [ $\mu\text{g/L}$ ] | 100          | 0.09             | 0.02            | 1.24 $\pm$ 0.18        | 1.25 $\pm$ 0.03             | 0.41 $\pm$ 0.08        | 0.375 $\pm$ 0.004           |
| Cu [ $\mu\text{g/L}$ ] | 93           | 0.004            | 0.001           | 0.52 $\pm$ 0.03        | 0.73 $\pm$ 0.01             | 0.20 $\pm$ 0.01        | 0.203 $\pm$ 0.03            |
| Pb [ng/L]              | 101          | 0.39             | 0.10            | 10 $\pm$ 4             | 11.66 $\pm$ 0.01            | 2.5 $\pm$ 0.8          | 2.8 $\pm$ 0.5               |

### S3: Seawater data

Table S3.1: Seawater dissolved concentrations collected in March 2021 in Nachsholim Site:

| Replicate | Cu [ $\mu\text{g/L}$ ] | Zn [ $\mu\text{g/L}$ ] | Pb [ng/L]       |
|-----------|------------------------|------------------------|-----------------|
| 1         | 0.35 $\pm$ 0.01        | 0.28 $\pm$ 0.05        | 9.97 $\pm$ 0.03 |
| 2         | 0.34 $\pm$ 0.02        | 0.31 $\pm$ 0.10        | 10.1 $\pm$ 0.6  |

#### S4: Statistical analyses

Statistical analyses were performed using R software [45]. For each dataset, assumptions of normality of the residuals and homogeneity of variances were tested, if both assumptions were valid, ANOVA was performed, and in cases of normality validation and homogeneity violation, Welch's ANOVA test was applied. Comparisons for unbalanced design or in cases where normality was violated, non-parametric Kruskal–Wallis test was applied. Asterisk and the red text indicate significant differences.

##### Lachlanella:

Table S4.1: Comparing ICPMS and LA-ICPMS from July 2013:

| Metal/Ca | Statistical test | Results                                |
|----------|------------------|----------------------------------------|
| Pb       | Kruskal–Wallis   | $\chi^2 = 8.35$ ,<br>p-value = 0.003*  |
| Sr       | Kruskal–Wallis   | $\chi^2 = 1.88$ ,<br>p-value = 0.170   |
| Mg       | Kruskal–Wallis   | $\chi^2 = 12.27$ ,<br>p-value < 0.001* |

Table S4.2: Statistical comparison of metal/Ca between March and August 2021:

| Metal/Ca | Statistical test | Results                                 |
|----------|------------------|-----------------------------------------|
| Pb       | One way ANOVA    | $F_{1,8} = 0.29$ ,<br>p-value = 0.986   |
| Cu       | One way ANOVA    | $F_{1,8} = 0.36$ ,<br>p-value = 0.566   |
| Zn       | Welch            | $F_{1,5.2} = 2.43$ ,<br>p-value = 0.178 |
| Sr       | One way ANOVA    | $F_{1,8} = 12.84$<br>p-value = 0.072    |
| Mg       | One way ANOVA    | $F_{1,8} = 31.46$<br>p-value < 0.001*   |

Table S4.3: Statistical comparison of metal/Ca between single chamber 2013-2014 LA-ICPMS analyses to whole shell 2021 ICPMS records:

| Metal/Ca | Statistical test | Results                                           |
|----------|------------------|---------------------------------------------------|
| Pb       | Welch            | $F_{5,2} = 23.99$ ,<br><b>p-value=0.002*</b>      |
| Cu       | Welch            | $F_{5,2} = 7.21$ ,<br><b>p-value= 0.033*</b>      |
| Zn       | Welch            | $F_{2,6.1} = 40.87$ ,<br><b>p-value&lt;0.001*</b> |
| Sr       | Kruskal–Wallis   | $\chi^2=5.18$<br>p-value= 0.075                   |
| Mg       | Welch            | $F_{2,5.8} = 50.00$ ,<br><b>p-value&lt;0.001*</b> |

*P. calcariformata*:

Table S4.4: Comparing ICPMS and LA-ICPMS:

| Sampling date | Metal/Ca | Statistical test | Results                                    |
|---------------|----------|------------------|--------------------------------------------|
| July 2013     | Pb       | Welch            | $F_{1,21} = 1.38$ ,<br>p-value= 0.253      |
|               | Sr       | Kruskal–Wallis   | $\chi^2=5.92$ ,<br><b>p-value = 0.014*</b> |
|               | Mg       | Kruskal–Wallis   | $\chi^2=3.19$ ,<br>p-value = 0.074         |
| March 2013    | Pb       | Kruskal–Wallis   | $\chi^2=5.36$ ,<br><b>p-value = 0.020*</b> |
|               | Sr       | Kruskal–Wallis   | $\chi^2=4.15$ ,<br><b>p-value = 0.041*</b> |
|               | Mg       | Kruskal–Wallis   | $F_{1,18} = 9.80$<br>p-value= 0.006        |

Table S4.5: Statistical comparison of metal concentration between March and August 2021:

| Metal/Ca | Statistical test | Statistical test                      |
|----------|------------------|---------------------------------------|
| Pb       | Welch            | $F_{1,1} = 0.07$ ,<br>p-value= 0.828  |
| Cu       | One way ANOVA    | $F_{1,3} = 1.12$ ,<br>p-value= 0.367  |
| Zn       | One way ANOVA    | $F_{1,3} = 176.2$ ,<br>p-value<0.001* |
| Sr       | One way ANOVA    | $F_{1,3} = 2.18$<br>p-value= 0.236    |
| Mg       | One way ANOVA    | $F_{1,3} = 8.95$<br>p-value=0.06      |

Table S4.6: Statistical comparison of metal/Ca between single chamber 2013-2014 LA-ICPMS analyses to whole shell 2021 ICPMS records:

| Metal/Ca | Statistical test | Statistical test                         |
|----------|------------------|------------------------------------------|
| Pb       | Welch            | $F_{2,1.8} = 300.06$ ,<br>p-value=0.005* |
| Cu       | Kruskal–Wallis   | $\chi^2 = 6.46$ ,<br>p-value= 0.122      |
| Zn       | Kruskal–Wallis   | $\chi^2 = 136.63$ ,<br>p-value<0.001*    |
| Sr       | Kruskal–Wallis   | $\chi^2 = 11.75$<br>p-value= 0.002*      |
| Mg       | Kruskal–Wallis   | $\chi^2 = 3.09$ ,<br>p-value=0.199       |
